# Supplementary material for: Medium effects on the photophysical properties of terbium(iii) complexes with pyridine-2,6-dicarboxylate
Source: Royal Society of Chemistry journal article supplement (doi:10.1039/b206370k), 2002-12-01
Supplement: b206370k.doc [file b206370k.doc]

Medium effects on the photophysical properties of terbium (III) complexes with pyridine-2,6-dicarboxylate

Guilford Jones, II**a,b* and Valentine I. Vullev*a,c,*[[1]](#footnote-2)†

a Department of Chemistry and the Photonics Center, Boston University, Boston, MA 02215, U. S. A., Fax: 617 353 6466;

b Tel: 617 353 8656; E-mail: [jones@chem.bu.edu](mailto:jones@chem.bu.edu)

c Tel: 617 353 8655; E-mail: [vullev@fas.harvard.edu](mailto:vullev@fas.harvard.edu)

Detector Assembly for Time-Resolved Measurements

For time-resolved emission measurements, a laser flash photolysis instrument with modified pulse and data-collection sequence was used. At each wavelength, the time-dependent light intensity was measured with a detection module designed to provide: (1) wide dynamic range of both, light intensity and time domains; (2) elimination of any DC (i.e., time-independent) component from the recorded signal. The latter was achieved by a compensating circuit designed to carry fast signals, while a fast PMT powered by an active bleeder circuit was essential for the former.

**Figure 7.** Schematics for PMT bleeder circuit. (For the voltage divider ¼-W metal film resistors were used in parallel to assure maximum circuit power of ½ W.)Error: Reference source not found

R11

R12

R2

R3

R4

R6

R5

R7

R8

R*adj*

R*adj*

R*adj*

The detector module was equipped with a fast Metal Package head-on PMT (R5600U-04, Hamamatsu)[[2]](#endnote-2) that is powered through an active bleeder circuit with an adjustable voltage divider and an independent high voltage (HV) supply for the cathode (Figure 7). A transistor-based PMT active bleeder circuit, first developed for high-energy physics experiments,[[3]](#endnote-3) is considerably more advantageous for this application than the alternative Zener-diode active circuit,[[4]](#endnote-4) because the former allows alteration of the dynode potentials through the adjustable voltage divider offering an easy way to set the optimal working conditions for the PMT. The capacitors at the base of the PMT are selected to cover the time range from picoseconds to hundreds of nanoseconds.[[5]](#endnote-5),[[6]](#endnote-6) During that time interval, the high-voltage transistors, T (MPSA42, Fairchild Semiconductors, fT = 50 MHz), will react and deviate the necessary amount of current from the voltage divider to the PMT, maintaining a constant potential at each dynode.Error: Reference source not found,[[7]](#endnote-7),[[8]](#endnote-8)

The contributions from background dark current (or the strong DC component observed during transient absorption measurements) are removed from the measured signal by a compensating circuit designed to carry fast signals. The design of this circuit is based on a DC precision amplifier with automatic null offset.[[9]](#endnote-9) In order to prevent nanosecond-signal distortion, only a single fast operational amplifier was used with feedback parameters that provide the optimal bandwidth (Figure 8). The current from the PMT is terminated at R*pmt* (250 ) and the ensuing signal voltage, *Vs*, is forwarded to the non-inverting input terminal of a fast operational amplifier, OA1 (LM7171, National Semiconductor),[[10]](#endnote-10) whose feedback is referenced to *Vg*. The signal current produced from OA1 is sent to an oscilloscope through a coaxial cable with an impedance of 50 . In order to prevent ringing, a termination with identical impedance, Rtm (50 ), is placed before the coaxial cable, matching also the termination in the oscilloscope (50 , DC coupling). In addition, detectable ringing between the PMT, R*pmt*, and OA1 is avoided by keeping those connections shorter than 5 – 10 mm. The interface between the compensating circuit and the CPU is realized through a quad bilateral switch (CD4066BC, Fairchild Semiconductor) (Figure 8b). The four switches are controlled by two gate signals generated from a relay array (ER-8) controlled by the digital I/O terminals of the PCI-MIO-16E-4 interface board. The compensating circuit has two states achieved by the *ZEROING* and *GROUNDING* gates.16

**Figure 8.** Schematics for: **(a)** compensating circuit (Cm = 34 F); **(b)** wiring of the quad bilateral switch; and **(c)** charge-leakage compensator.

The compensating circuit does not compromise the signal-to-noise ratio, *S/N*, which depends solely on the PMT parameters and the amount of light that gets to the cathode, and can be estimated from the cathode, *ik*, or anode, *ip*, currents:[[11]](#endnote-11)

(6)

where *f* is the frequency bandwidth of the measurement, *e* is the electron charge, *F* is the electron collection efficiency representing the probability of an accelerated electron to cause an avalanche upon striking the dynode,[[12]](#endnote-12) ** is the PMT gain, and ** is the average gain at each stage, hence, for an *n*-stage photomultiplier, *n* = **..

Deconvolution of the Emission Spectra

**Figure 9.** Examples of deconvolution of the 7F4  5D4 and 7F5  5D4 transitions observed in the emission spectra of terbium (III) and *mono-* and *tris-*Tb-DPA complexes.

Although alterations of the ligand sphere of Tb3+ do not cause discernable spectral shifts of the 7F*J*  5D4 transitions, the appearance of fine structure and band splitting are indication of fluctuations of the oscillator strengths and the energies of the levels within the seven heptet states, phenomena resultant predominantly from changes in the symmetry of the crystal field. It has been determined, for instance, that Tb(DPA)3 has 33 7F*J* states that can be observed in crystals under cryogenic conditions.25 The emission spectra (plotted against energy units) were fitted to a sum of functions that contain Gaussian and Lorentzian components:[[13]](#endnote-13)

(7)

where , and *g* and *l* are, respectively, the weighing coefficients for the Gaussian and the Lorentzian contributions to each component of the spectral bands.

Examples for fitting the emission data (7F4  5D4 and 7F5  5D4 transitions) with eq. 7 are shown on Figure 9. Table 4 summarizes the results of the spectral deconvolution for Tb with different number of DPA ligands. The fine spectral features and the band splitting observed for Tb(DPA)3 indicate that for the *tris-*conjugate the fitting procedure yielded the smallest line broadening and the largest number of components (Table 4). This finding is an indication of higher uniformity of the *tris-*Tb-DPA species in the sample solutions. The spectrum of the least symmetric, Tb(DPA) complex, exhibits the smallest number of discernable spectral components (Figure 9 and Table 4). The exact number and type of ligands coordinated to Tb3+ and its mono-complex with DPA are not known; however, the fact that changes in pH and the type of the salt do not have strong effects on the spectral appearance suggests that replacement of water with other species, usually oxygen containing anions, does not perturb the energetics of the 5D4 and 7F*J* states.

**Table 4.** Results from deconvolution of the emission spectra of terbium (III), Tb(DPA) and Tb(DPA)3 (see Figure 3 and 10).

| |  | Tb | | | | | **Tb(DPA)** | | | | | **Tb(DPA)3** | | | | | | --- | --- | --- | --- | --- | --- | --- | --- | --- | --- | --- | --- | --- | --- | --- | --- | |  | **0  / cm–1 | **  /cm–1 | **G*a* | **L*a* | S b | **0  / cm–1 | **  /cm–1 | **G*a* | **L*a* | S b | **0  / cm–1 | **  /cm–1 | **G*a* | **L*a* | S b | | **7F6  5D4** | 20,540  20,410 | 155  256 | 1.00  0.884 | 0.000  0.116 | 0.157  0.216 | 20,530  20,400 | 129  246 | 0.985  0.913 | 0.015  0.087 | 0.168  0.218 | 20,560  20,350 | 72.1  119 | 0.997  0.503 | 0.003  0.497 | 0.066  0.360 | | **7F5  5D4** | 18,450  18,260 | 110  126 | 0.969  0.698 | 0.031  0.302 | 0.305  0.165 | 18,420  18,250 | 145  128 | 1.00  0.520 | 0.000  0.480 | 0.397  0.076 | 18,440  18,300  18,210 | 75.0  56.4  53.9 | 0.987  0.021  0.911 | 0.013  0.979  0.089 | 0.215  0.191  0.050 | | **7F4  5D4** | 17,220  17,050 | 85.6  103 | 0.998  0.639 | 0.002  0.361 | 0.042  0.071 | 17,180  17,020 | 102  113 | 0.994  0.514 | 0.006  0.486 | 0.061  0.042 | 17,180  17,070  16,910 | 37.3  72.7  47.1 | 0.425  0.458  0.282 | 0.575  0.542  0.718 | 0.044  0.035  0.013 | | **7F3  5D4** | 16,200  16,110 | 59.8  55.0 | 0.615  0.570 | 0.385  0.430 | 0.017  0.021 | 16,200  16,120 | 59.9  61.9 | 0.687  0.571 | 0.313  0.429 | 0.006  0.025 | 16,140  16,090  16,010 | 12.7  60.4  11.6 | 0.395  0.534  0.904 | 0.605  0.466  0.096 | 0.002  0.020  0.001 | | **7F2  5D4** | 15,490  15,360 | 62.9  155 | 0.090  0.986 | 0.910  0.014 | 0.001  0.001 | 15,460 | 102 | 0.322 | 0.678 | 0.003 | 15,480  15,380 | 45.6  41.0 | 0.324  0.229 | 0.676  0.771 | 0.0010  0.0008 | | **7F1  5D4** | 14,980 | 96.3 | 0.137 | 0.863 | 0.003 | 15,010 | 79.4 | 0.001 | 0.999 | 0.002 | 15,010  14,970 | 25.7  89.4 | 0.128  0.979 | 0.872  0.021 | 0.0003  0.0005 | | **7F0  5D4** | 14,740 | 56.1 | 0.985 | 0.015 | 0.001 | 14,750 | 54.4 | 0.184 | 0.816 | 0.001 | 14,740 | 34.1 | 0.967 | 0.033 | 0.0004 | |
| --- | --- | --- | --- | --- | --- | --- | --- | --- | --- | --- | --- | --- | --- | --- | --- | --- | --- | --- | --- | --- | --- | --- | --- | --- | --- | --- | --- | --- | --- | --- | --- | --- | --- | --- | --- | --- | --- | --- | --- | --- | --- | --- | --- | --- | --- | --- | --- | --- | --- | --- | --- | --- | --- | --- | --- | --- | --- | --- | --- | --- | --- | --- | --- | --- | --- | --- | --- | --- | --- | --- | --- | --- | --- | --- | --- | --- | --- | --- | --- | --- | --- | --- | --- | --- | --- | --- | --- | --- | --- | --- | --- | --- | --- | --- | --- | --- | --- | --- | --- | --- | --- | --- | --- | --- | --- | --- | --- | --- | --- | --- | --- | --- | --- | --- | --- | --- | --- | --- | --- | --- | --- | --- | --- | --- | --- | --- | --- | --- | --- | --- | --- | --- | --- | --- | --- | --- | --- | --- | --- | --- | --- | --- | --- | --- |

–

–

–

–

–

–

*a* Normalized contribution of the Gaussian and Lorentzian terms from eq. 7, i.e., and .

*b* Normalized peak area.

Investigation of Possible Intermolecular Energy Transfer

Intermolecular energy transfer when terbium (III) is in excess

When terbium is in large excess in comparison to DPA, intermolecular energy transfer (eq. 4) may cause quenching of the emission of Tb(DPA) resulting in shortening the excited-state lifetimes and decrease of the luminescence quantum yields. The following processes are representative of the overall kinetics:

Tb(DPA) + *hv*  Tb(DPA*)  Tb*(DPA) *khv*1 (8)

Tb + *hv*  Tb* *khv*2 (9)

Tb*(DPA) + Tb  Tb(DPA) + Tb* *ket*(+) (4a)

Tb(DPA) + Tb*  Tb*(DPA) + Tb *ket*(–) (4b)

Tb*(DPA) + Tb Tb(DPA*) + Tb (4c)[[14]](#endnote-14)

Tb(DPA*) + Tb Tb(DPA) + Tb* (4d)Error: Reference source not found

Tb*(DPA)  Tb(DPA) *kd*1 (9)

Tb*  Tb *kd*2 (10)

Thus, the kinetic equations for the excited species are:

(11a)

(11b)

For time-resolved experiments, *khv*1 and *khv*2 can be ignored since they have non-zero values only during the excitation pulse that practically is at *t* = 0. Also, since the total terbium concentration, *C*Tb, exceeds the total concentration of DPA, *C*DPA, and hence of Tb(DPA), the equilibrium concentration of non-conjugated terbium (III) can be approximated to its total concentration, i.e., [Tb]  *C*Tb. For the latter approximation to be valid, it is mandatory that the excitation power is kept relatively low so that very small portion of the species would be excited at the beginning of the time evolution; thus, the conditions dictate [Tb] >> [Tb*], [Tb(DPA)] >> [Tb*(DPA)] and hence, [Tb(DPA)]  [Tb(DPA)]*t* = 0 = *C*DPA. Applying all these approximations to eq. 11 yields the following vector differential equation:

(12)

where and .

Apparently, the solutions of 12 will have a double exponential form:

(13)

where, **1 and **2 are the eigenvalues of matrix **A** and **u1** and **u2** are the corresponding eigenvectors. The pre-exponential coefficient **1 and **2 can be estimated from the initial conditions.

All the experimental emission decay data for samples where terbium was in significant excess, could only be reliably fit to a mono-exponential decay function (eq. 1) and the lifetimes obtained were independent of the total terbium concentration, *C*Tb (Table 3), and the excitation laser power. Therefore, it can be concluded that intermolecular energy transfer (eq. 4) does not occur under any of the employed conditions. An additional proof for this conclusion is the fact that the steady-state emission spectra did not show a “signature” of Tb luminescence (see Figure 3) that would be expected if significant amount of Tb* was generated.

Intermolecular energy transfer when DPA is in excess

Since cases of intermolecular energy transfer from the lowest triplet excited state of an organic chromophore to Tb(DPA)3 have been previously reported,49 it is reasonable to examine the samples where free DPA is present in addition of the *tris-*Tb-DPA complex, for possibility for such processes to occur. Furthermore, since the optical densities of the free and Tb-bound DPA chromophores are compatible at the excitation wavelength, when dipicolinate is present in excess, its excited species, DPA*, are readily generated in congruent amounts. The expected photo-kinetics can be described as follows:

Tb(DPA)3 + *hv*  Tb*(DPA)3 *khv*1 (14)

DPA + *hv*  DPA* *khv*2 (15)

Tb*(DPA)3 + DPA  Tb(DPA)3 + DPA* *ket*(+) (5a)

Tb(DPA)3 + DPA*  Tb*(DPA)3 + DPA *ket* (5b)

Tb*(DPA)3  Tb(DPA)3 *kd*1 (16)

DPA*  DPA *kd*2 (17)

Similar to the case described in the previous section, for time-resolved experiments with pulse excitation, *khv*1 and *khv*2 can be eliminated. Also, since energy transfer from the lowest pentaplet state of terbium (III) to DPA is very endothermic,Error: Reference source not found eq. 5a can be reasonably ignored. If the excitation power is kept low enough so that very small portions of the absorbing chromophores are converted to their excited states at the beginning of the decay evolution, it is reasonable to assume that [Tb(DPA)3]  *C*Tb, where *C*Tb is the total concentration of terbium (III). Therefore, the kinetics of the DPA and Tb(DPA)3 excited species can be described as follows:

(18a)

(18b)

From eq. 18b it is apparent that the decay of the DPA* species should be monoexponential:

(19)

After substituting eq. 19 in eq. 18a, the latter can be solved by employing Laplace transforms to yield a double-exponential decay law for the *tris-*Tb-DPA excited species:

(20)

where and .

However, the attempts to fit the measured emission decay data to a double-exponential function (eq. 1) failed, and furthermore, the extracted lifetimes did not manifest a dependence on the DPA concentration (Table 3).

Concurrently, the corresponding excitation spectra resemble the absorption spectra of DPA that is ligated to Tb3+ (Figure 5), and if the intermolecular energy transfer (eq. 5b) occurs, a contribution of the absorption spectrum of the free DPA chromophore (Figure 4a) ought to be detected in the measured excitation spectra.

Therefore, it can be concluded with high certainty that intermolecular energy transfer between DPA and Tb(DPA)3 moieties (eq. 5) cannot be detected under the employed conditions. In the reported cases where such processes are observed, indications of electrostatic attraction and other forms of binding between the energy donors and acceptors provide reasonable explanations for alternative findings.49

Referenceces

1. † Present address: *Department of Chemistry and Chemical Biology, Harvard University, Cambridge, MA 02138, U.S.A.* [↑](#footnote-ref-2)
2. H. Kyushima, Y. Hasegawa, A. Atsumi, K. Nagura, H. Yokota, M. Ito, J. Takeuchi, K. Oba, H. Matsuura and S. Suzuki, Photomultiplier of new dynode configuration, *IEEE Trans. Nucl. Sci.*, 1994, **NS-41**, 725-729. [↑](#endnote-ref-2)
3. C. R. Kerns, A high-rate phototube base, *IEEE Trans. Nucl. Sci.*,1977, **NS-24**, 353-355. [↑](#endnote-ref-3)
4. A. Fenster, J. C. LeBlanc, W. B. Taylor and H. E. Johns, Linearity and fatigue in photomultipliers, *Rev. Sci. Instrum.*, 1973, **44**, 689-694. [↑](#endnote-ref-4)
5. 0.1 nF, 1 nF, 10 nF, 0.1 F, 1 F and 47 F for C1, 2, 3, 4, 5 and 6, respectively. [↑](#endnote-ref-5)
6. In our latest design, the omission of capacitors C5 did not compromise the performance of the detector. Intuitively, no detectable distortion in the signal reading is expected should many of the other capacitors are removed. However, without further testing, we are to keep on the safe side since the experimental requirements are for a capability to measure rise and decay kinetics of relatively large signals form DC to about 100 MHz range. [↑](#endnote-ref-6)
7. The diodes, D (Diodes Incorporated, SD101-A), are to prevent transistor damages in a case of reverse voltage shocks. [↑](#endnote-ref-7)
8. HVK (– 820 V) and HVD (– 730 V) were maintained by independent power supplies. (10 W power supply was used for HVD: i.e., at 1 kV can provide up to 10 mA current.) The potentiometers, R*adj*, were selected to be 20 k, although 10 k can be applied, too. Each of the desired resistances, R11, R12 and R2 – R8, were obtained by connecting 2 – 4 resistors in parallel with values selected, so that: (1) the current through the voltage divider was maintained between 5 and 6 mA; (2) R11 = ** R12, where ** was set between 0.9 and 0.95 and determines the steady-state base voltage of the D2–D3 transistor: the larger the difference between R11 and R12 is, the larger the dark DC current through the transistor array, and concurrently, the faster the switching of the transistors will be; (3) the voltage at D8 was 10% of HVD, and the voltage differences between the other dynodes were: VD7–D8 = 0.15 HVD, VD6–D7 = 0.14 HVD, VD5–D6 = 0.13 HVD, VD4–D5 = 0.12 HVD, VD3–D4 = 0.11 HVD, VD2–D3 = 0.12 HVD, and VD1–D2 = 0.13 HVD. It ought to be emphasized that in order to avoid heating of the detector, the voltage divider is not placed in the PMT housing, rather, it is installed in an air-cooled case connected to the rest of the detector assembly via high-voltage cables.

   [↑](#endnote-ref-8)
9. P. Horowitz and W. Hill, Precision circuits and low-noise techniques, in *The Art of Electronics*, 2nd edition, Cambridge University Press, U.K., 1989, pp. 391-470. [↑](#endnote-ref-9)
10. In the first compensating circuit design we used another National Semiconductor operational amplifier CLC449 with bandwidth exceeding 1 GHz. However, in the later designs LM7171 was the integrated circuit of choice because of its larger input dynamic range. [↑](#endnote-ref-10)
11. F. Roben, (1971) Noise in the measurement of light with photomultipliers, *Appl. Opt.*, 1971, **10**, 776-796; R. R. Alfano and N. Ockman, Methods for detecting weak light signals, *J. Opt. Soc. Am.*, 1968, **58**, 90-95. [↑](#endnote-ref-11)
12. R. Foord, R. Jones, C. J. Oliver and E. R. Pike, The use of photomultiplier tubes for photon counting, *Appl. Opt.*, 1996, **8**, 1975-1989. [↑](#endnote-ref-12)
13. A. Gallagher, in *Atomic, Molecular, & Optical Physics Handbook*, ed. Gordon W. F. Drake, AIP, Woodbury, NY, U.S.A., 1996, pp. 220-232. [↑](#endnote-ref-13)
14. Once the energy is transferred from a photoexcited DPA ligand to the terbium ion, and the latter decays to its lowest pentaplet excited state, 5D4, it stays trapped at that state until it decays to its heptaplet ground states. In other words, it is impossible for the Tb-DPA complex to go back to its upper excited states, thus, excluding any possibility for back intramolecular energy transfer to the DPA ligands. Actually, to achieve the second pentaplet state, 5D3, or the lowest triplet excited state of DPA, respectively, energy of 16 or 19 kcal/mol will be necessary, which is apparently unattainable under the employed conditions. [↑](#endnote-ref-14)
